# Supplementary material
Source: Springer Nature journal article supplement (https://www.springermedizin.de/resource/supplementary/12937_2011_470_MOESM1_ESM.pdf/25653132)

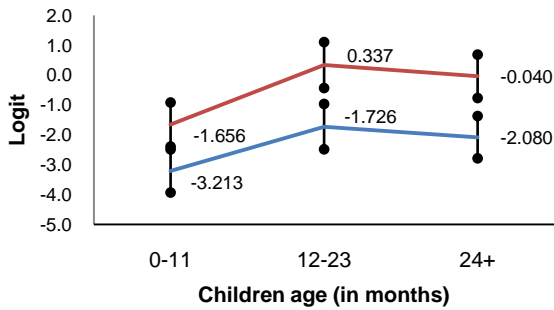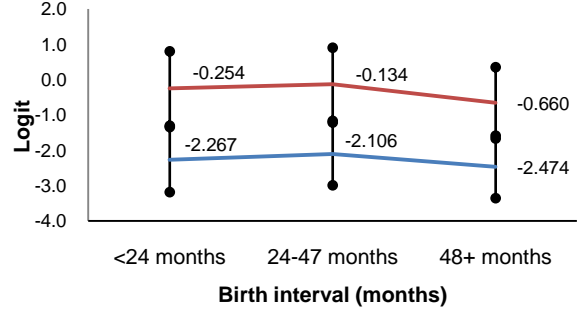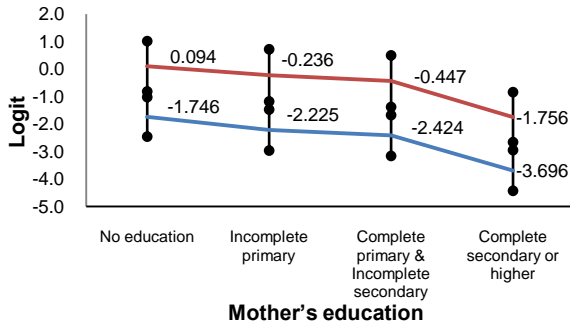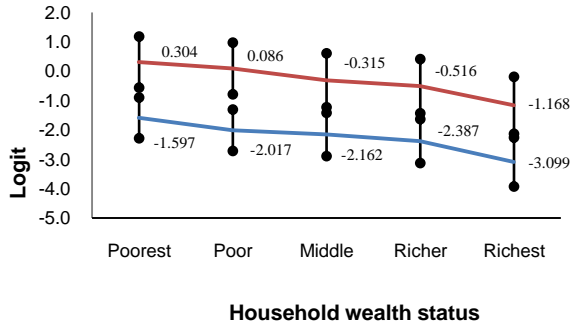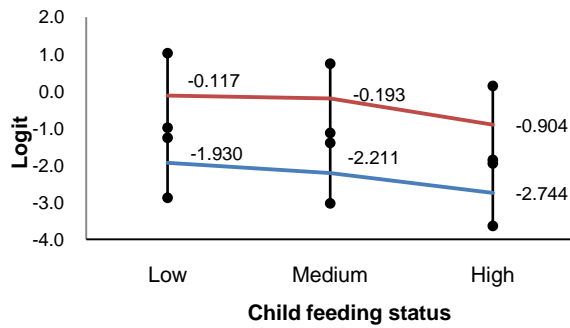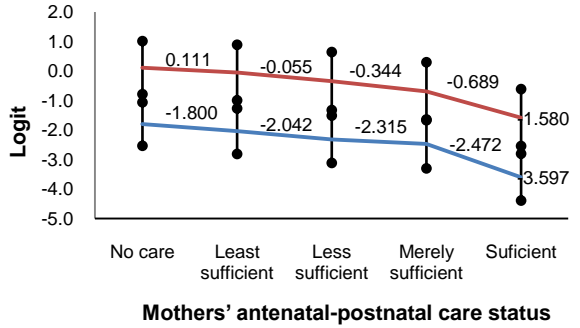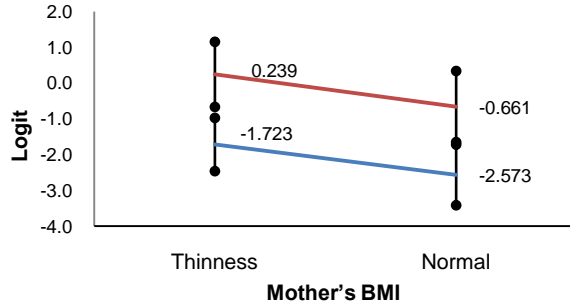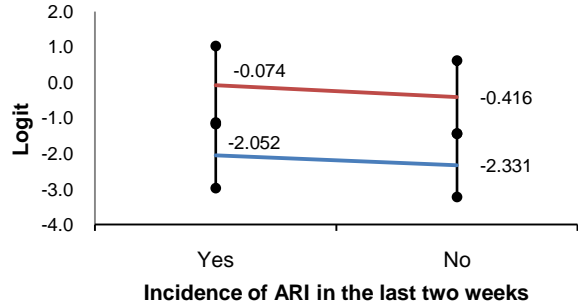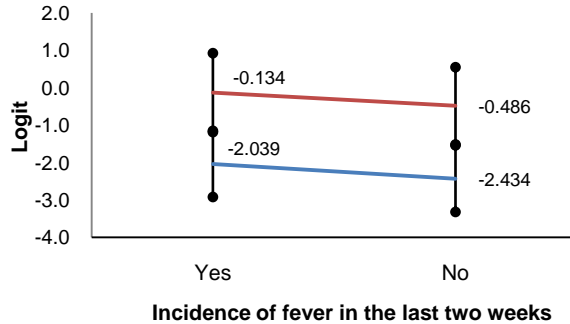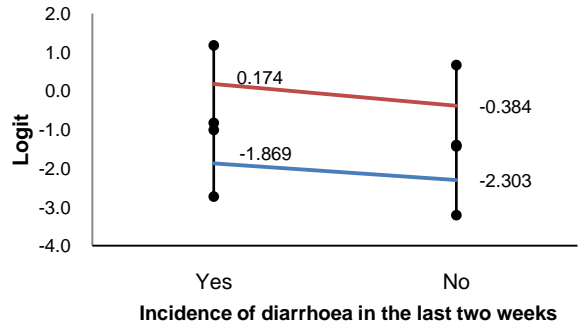

— Model 1 (at least moderate undernutrition)

— Model 2 (at least severe undernutrition)

Supplement: MOESM1 [file 25653132]
